# Supplementary material for: Differing thermal sensitivities of physiological processes alter ATP allocation
Source: Oxford University Press journal article supplement (doi:10.1242/jeb.233379), 2020-01-01
Supplement: jeb233379supp.pdf [file jeb233379supp.pdf]

## SUPPLEMENTARY TABLES

**Table S1. Allocation of ATP to protein synthesis in larvae of *Crassostrea gigas* of different sizes**

| Shell length<br>( $\mu\text{m}$ ) | Protein synthesis<br>( $\text{ng larva}^{-1} \text{d}^{-1}$ ) | Respiration<br>( $\text{pmol O}_2 \text{larva}^{-1} \text{d}^{-1}$ ) | ATP allocation<br>(%) |
|-----------------------------------|---------------------------------------------------------------|----------------------------------------------------------------------|-----------------------|
| 100                               | 33                                                            | 398                                                                  | 36%                   |
| 120                               | 61                                                            | 662                                                                  | 40%                   |
| 140                               | 102                                                           | 1018                                                                 | 43%                   |
| 160                               | 159                                                           | 1478                                                                 | 47%                   |
| 180                               | 236                                                           | 2053                                                                 | 50%                   |
| 200                               | 335                                                           | 2755                                                                 | 53%                   |
| 220                               | 461                                                           | 3594                                                                 | 56%                   |
| 240                               | 616                                                           | 4581                                                                 | 58%                   |
| 260                               | 805                                                           | 5728                                                                 | 61%                   |
| 280                               | 1032                                                          | 7043                                                                 | 64%                   |
| 300                               | 1299                                                          | 8538                                                                 | 66%                   |

**Table S2. Allocation of ATP to protein synthesis in larvae of *Crassostrea gigas* at different temperatures**

| Temperature (°C) | Protein synthesis (ng larva <sup>-1</sup> d <sup>-1</sup> ) | Respiration (pmol O <sub>2</sub> larva <sup>-1</sup> d <sup>-1</sup> ) | ATP allocation (%) |
|------------------|-------------------------------------------------------------|------------------------------------------------------------------------|--------------------|
| 15               | 112                                                         | 1378                                                                   | 35%                |
| 20               | 194                                                         | 1948                                                                   | 43%                |
| 25               | 335                                                         | 2755                                                                   | 53%                |
| 30               | 581                                                         | 3896                                                                   | 65%                |
